# Supplementary material
Source: publisher figshare collection journal article supplement (https://aacr.figshare.com/articles/dataset/_/23274969)
Supplement: Supplementary file 1 [file 41022606]

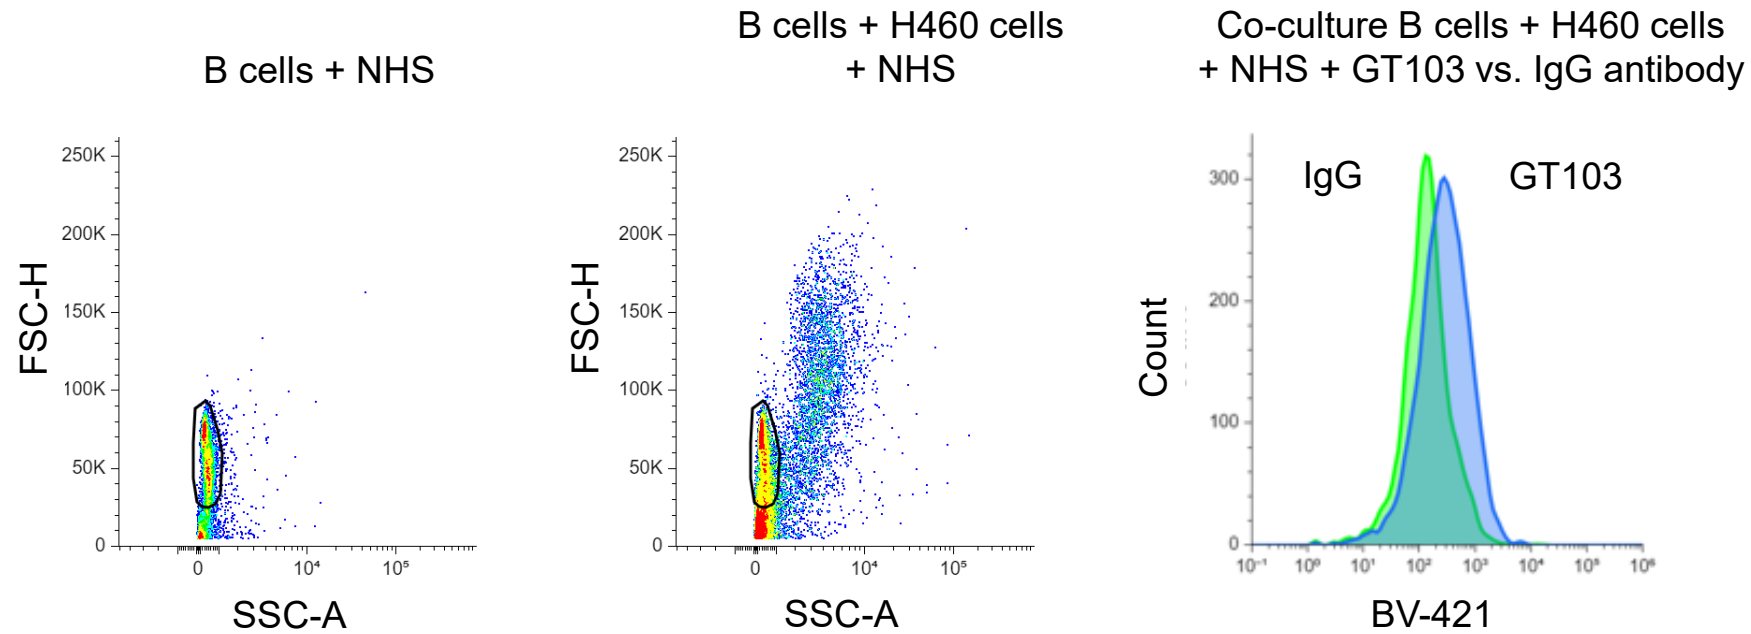

**Figure S5. Gating strategy for detection of phosphorylated Syk kinase in B cells.** The plots for **Figure 4B** are derived from a flow cytometry experiment in which B cells were gated by forward scatter (FSC-H) and side scatter (SSC-A), as demarcated in the first panel, and the identical B cell gate was used when B cells were mixed with the larger tumor cells, as shown in the second panel. (Normal human serum [NHS], but not antibodies, was added to these gating mixtures.) The third panel shows a histogram of one reaction (of triplicates) in which B cells and H460 tumor cells were co-cultured in the presence of NHS and either GT103 or subtype-matched IgG. After co-culture, cell mixtures were incubated with anti-P-Syk primary antibody, washed, and then incubated with a BV-421 anti-rabbit secondary antibody. Fluorescence counts within the B cell gate were determined.
